# Supplementary material for: Barriers to handpump serviceability in Malawi: life-cycle costing for sustainable service delivery
Source: Royal Society of Chemistry journal article supplement (doi:10.1039/d0ew00283f), 2020-01-01
Supplement: d0ew00283f1.pdf [file d0ew00283f1.pdf]

**Supplementary Information:**  
**Barriers to handpump serviceability in Malawi: Life-cycle costing  
for sustainable service delivery**

1. Afridev Life-cycle Costs
2. Distribution of Households and tariffs
3. Shortfall in potential financial resources

*Jonathan P. Truslove, Andrea B. Coulson, Emma Mbalame and Robert. M Kalin*

### 1. Afridev Life-cycle Costs

**Table S1.** Life-cycle of Afridev components and estimated costs from suppliers for a borehole of 30m.

| Afridev component                                | No. installed | Life-cycle (Years) |      | Supplier 1 (MWK) | Supplier 2 (MWK) | Supplier 3 (MWK) | Supplier 4 (MWK) | Supplier 5 (MWK) | Supplier 6 (MWK) | Average Cost (MWK) |
|--------------------------------------------------|---------------|--------------------|------|------------------|------------------|------------------|------------------|------------------|------------------|--------------------|
|                                                  |               | Worst              | Best |                  |                  |                  |                  |                  |                  |                    |
| Head (Full Assembly – Cover, Case, Bolts, Spout) | 1             | 10                 | 15   | N/A              | 34600            | N/A              | N/A              | 44500            | 69500            | 49533              |
| Handle Assembly                                  | 1             | 10                 | 15   | N/A              | N/A              | N/A              | N/A              | 36500            | 42500            | 39500              |
| Rodhanger Assembly                               | 1             | 5                  | 8    | 4946             | N/A              | N/A              | N/A              | 4650             | N/A              | 4798               |
| Fulcrum Pin Assembly                             | 1             | 5                  | 8    | 3935             | N/A              | N/A              | N/A              | 4250             | 6950             | 5045               |
| Fulcrum Pin Bush-Bearings                        | 2             | 1                  | 2    | 675              | N/A              | N/A              | N/A              | 475              | 450              | 533                |
| Hanger Pin Assembly                              | 1             | 5                  | 8    | 3035             | N/A              | N/A              | N/A              | 3975             | 3950             | 3653               |
| Hanger Pin Bush Bearings                         | 2             | 1                  | 2    | 675              | N/A              | N/A              | N/A              | 475              | 450              | 533                |
| Pedestal                                         | 1             | 10                 | 15   | N/A              | 20000            | N/A              | N/A              | N/A              | N/A              | 20000              |
| Rods (3m)                                        | 9             | 3                  | 5    | 8432             | 7500             | N/A              | N/A              | 11500            | 9000             | 9108               |
| Bottom Rod (3m)                                  | 1             | 3                  | 5    | N/A              | 15000            | N/A              | N/A              | N/A              | N/A              | 15000              |
| Rod Centralisers                                 | 9             | 2                  | 3    | 562              | N/A              | N/A              | N/A              | 466              | 450              | 493                |
| Rising main pipe (3m)                            | 9             | 3                  | 5    | 5958             | N/A              | N/A              | N/A              | 6500             | 6950             | 6469               |
| Top Sleeve                                       | 1             | 3                  | 5    | 675              | N/A              | N/A              | N/A              | 1200             | N/A              | 937                |
| Flapper                                          | 1             | 3                  | 5    | 450              | N/A              | N/A              | N/A              | 1200             | N/A              | 825                |
| Socket (Double End)                              | 8             | 3                  | 5    | N/A              | 1200             | 600              | N/A              | 1200             | 1150             | 1038               |
| Rising Main Centralisers                         | 8             | 3                  | 5    | 675              | N/A              | N/A              | N/A              | 490              | N/A              | 582                |

**Table S1 (cont.)**

|                                           |   |    |    |       |      |     |     |       |       |       |
|-------------------------------------------|---|----|----|-------|------|-----|-----|-------|-------|-------|
| Cylinder Assembly                         | 1 | 5  | 8  | 40022 | N/A  | N/A | N/A | 45000 | 59500 | 48174 |
| Plunger Body                              | 1 | 3  | 5  | 6970  | N/A  | N/A | N/A | 6800  | 9500  | 7757  |
| Cup Seal (U-seal)                         | 1 | 2  | 3  | 337   | N/A  | N/A | N/A | 220   | 450   | 336   |
| Plunger Bobbin                            | 1 | 2  | 3  | 337   | N/A  | N/A | N/A | 360   | N/A   | 349   |
| Foot Valve Body                           | 1 | 3  | 5  | N/A   | N/A  | N/A | N/A | 3200  | 2950  | 3075  |
| O-ring                                    | 1 | 2  | 3  | 225   | N/A  | N/A | N/A | 110   | N/A   | 167   |
| Foot Valve Bobbin                         | 1 | 2  | 3  | 337   | N/A  | N/A | N/A | 360   | N/A   | 349   |
| Cone Flange                               | 1 | 10 | 15 | N/A   | N/A  | N/A | N/A | 4500  | 6950  | 5725  |
| Compression Cone                          | 1 | 5  | 8  | 1349  | N/A  | N/A | N/A | 3000  | 2950  | 2433  |
| Rope                                      | 1 | 10 | 15 | N/A   | 6500 | N/A | N/A | 6500  | 7500  | 6833  |
| Area Mechanic<br>Contract<br>(Operations) | 1 | -  | -  | 3373  | N/A  | N/A | N/A | N/A   | N/A   | 3373  |
| Transport costs<br>(Operations)           | 1 | -  | -  | 1124  | N/A  | N/A | N/A | N/A   | N/A   | 1124  |

\*where 1USD = 738.64 MWK as of 9<sup>th</sup> of December 2019.

**Table S2.** Life-cycle cost of Afridev over 15-year design life

| Worst Case |             |                |                           |                   |                              | Best Case |             |                |                           |                   |                              |
|------------|-------------|----------------|---------------------------|-------------------|------------------------------|-----------|-------------|----------------|---------------------------|-------------------|------------------------------|
| Year       | Occurrences | R.R Cost (MWK) | Cumulative R.R Cost (MWK) | T.OpEx Cost (MWK) | Cumulative T.OpEx Cost (MWK) | Year      | Occurrences | R.R Cost (MWK) | Cumulative R.R Cost (MWK) | T.OpEx Cost (MWK) | Cumulative T.OpEx Cost (MWK) |
| 1          | 2           | 2133           | 2133                      | 6630              | 6630                         | 1         | 0           | 0              | 0                         | 0                 | 0                            |
| 2          | 7           | 7603           | 10064                     | 12100             | 25359                        | 2         | 2           | 2133           | 2133                      | 6630              | 6630                         |
| 3          | 11          | 172088         | 178527                    | 176584            | 220673                       | 3         | 5           | 5471           | 7603                      | 9967              | 23226                        |
| 4          | 7           | 7603           | 186459                    | 12100             | 428087                       | 4         | 2           | 2133           | 9736                      | 6630              | 46453                        |
| 5          | 7           | 66236          | 252695                    | 70733             | 706234                       | 5         | 9           | 169955         | 179691                    | 174452            | 244131                       |
| 6          | 16          | 177042         | 426440                    | 181539            | 1165920                      | 6         | 7           | 7603           | 187294                    | 12100             | 453909                       |
| 7          | 2           | 2133           | 428573                    | 6630              | 1632235                      | 7         | 0           | 0              | 187294                    | 0                 | 663687                       |
| 8          | 7           | 7603           | 436504                    | 12100             | 2110650                      | 8         | 7           | 66236          | 253530                    | 70733             | 944198                       |
| 9          | 11          | 172088         | 604967                    | 176584            | 2765650                      | 9         | 5           | 5471           | 259001                    | 9967              | 1234676                      |
| 10         | 19          | 181040         | 786335                    | 185536            | 3606186                      | 10        | 11          | 172088         | 431088                    | 176584            | 1701739                      |
| 11         | 2           | 2133           | 788468                    | 6630              | 4453352                      | 11        | 0           | 0              | 431088                    | 0                 | 2168802                      |
| 12         | 16          | 177042         | 962213                    | 181539            | 5482056                      | 12        | 7           | 7603           | 438692                    | 12100             | 2647965                      |
| 13         | 2           | 2133           | 964346                    | 6630              | 6517390                      | 13        | 0           | 0              | 438692                    | 0                 | 3127127                      |
| 14         | 7           | 7603           | 972277                    | 12100             | 7564824                      | 14        | 2           | 2133           | 440824                    | 6630              | 3612920                      |
| 15         | 16          | 233116         | 1201768                   | 237613            | 8849871                      | 15        | 21          | 285443         | 726267                    | 289940            | 4388651                      |

\*Where R.R = Recommended Repairs and T.OpEx = Total Operations Expenditure.

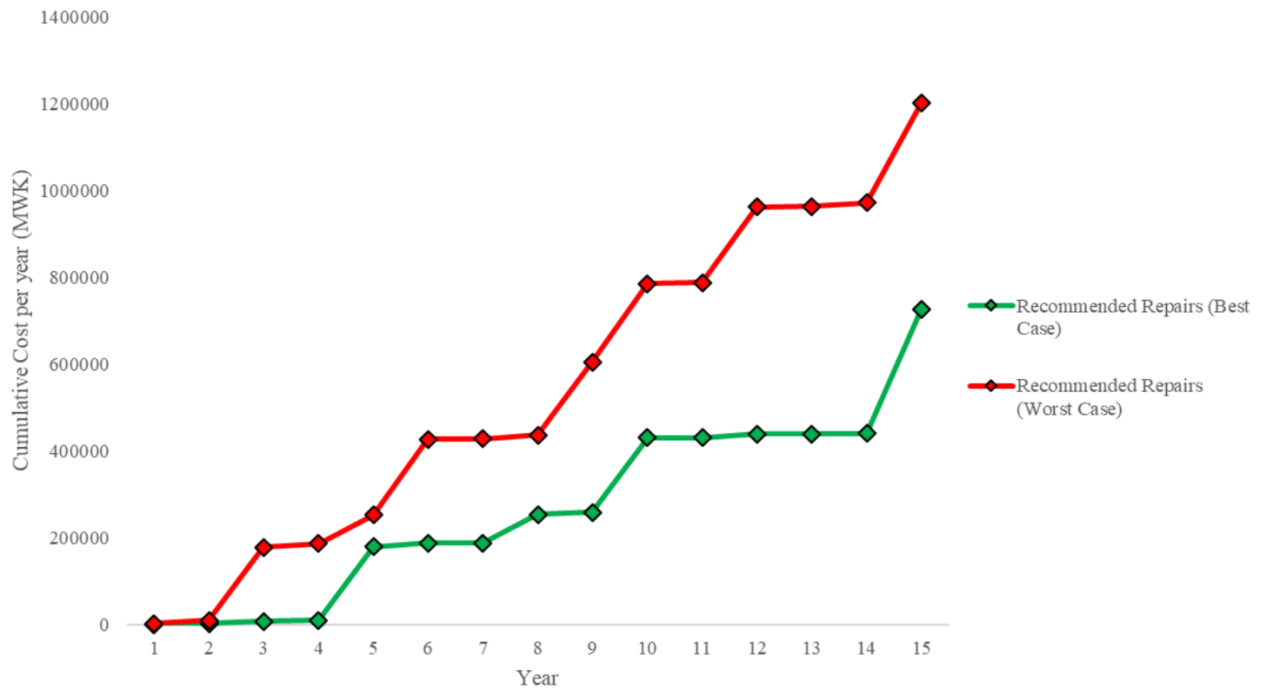

**Figure S1.** Recommended Repairs cumulative costs (MWK)

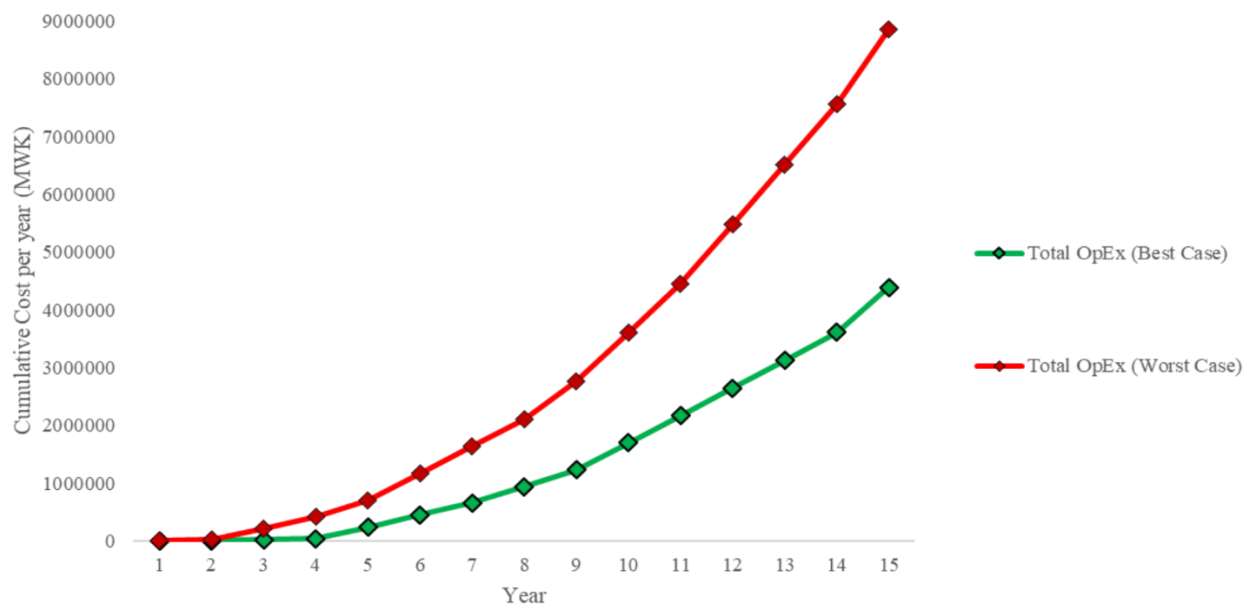

**Figure S2.** Total Operations Expenditure (T.OpEx) cumulative costs (MWK)

## 2. Distribution of Households and tariffs

Tariffs are the primary financial mechanism to finance the necessary O&M for rural water points in the form of household contributions or user fees (United Nations, 2018). The potential financial resources available to a service provider can be determined by the tariff amount, the frequency of collection and the number of contributing households. Table S3 describes the groupings of user and tariff amount. Figure S3 presents the distribution of potentially contributing households and the grouping of tariff amounts with respect to the tariff collection frequency scenarios.

**Table S3.** User and tariff amount grouping

| Value | No. of Users Group | No. of Households Group | No. of Tariffs (MWK) |
|-------|--------------------|-------------------------|----------------------|
| 1     | >0 & ≤ 75          | 15                      | ≤100                 |
| 2     | >75 & ≤150         | 30                      | >100 & ≤200          |
| 3     | >150 & ≤225        | 45                      | >200 & ≤300          |
| 4     | >225 & ≤300        | 60                      | >300 & ≤400          |
| 5     | >300 & ≤375        | 75                      | >400 & ≤500          |
| 6     | >375 & ≤450        | 90                      | >500 & ≤600          |
| 7     | >450 & ≤525        | 105                     | >600 & ≤700          |
| 8     | >525 & ≤600        | 120                     | >700 & ≤800          |
| 9     | >600               | >120                    | >800 & ≤900          |
| 10    | -                  | -                       | >900 & ≤1000         |
| 11    | -                  | -                       | >1000 & ≤2000        |
| 12    | -                  | -                       | >2000                |

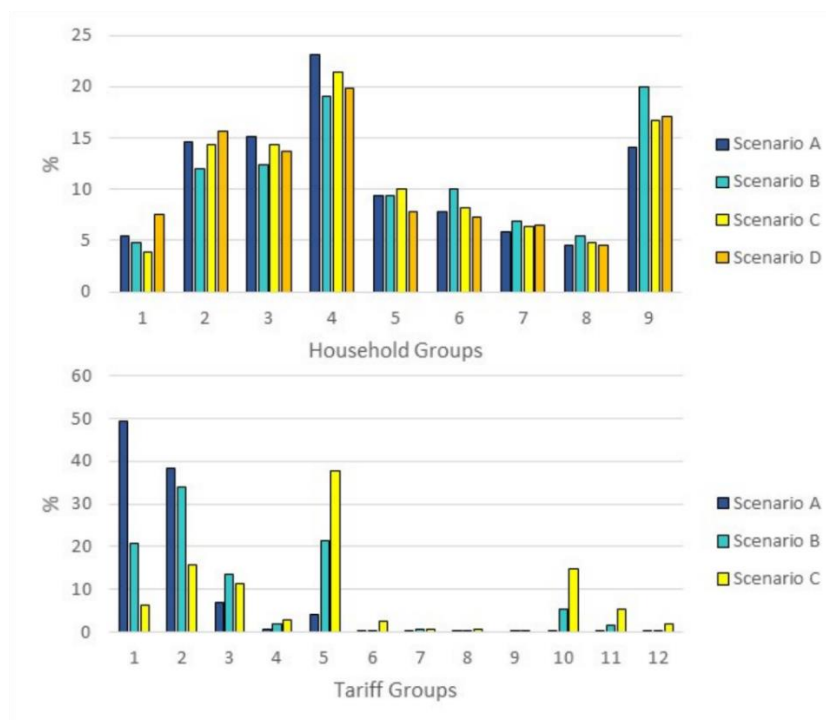

**Figure S3.** Household groups (above) and tariff groups (below) by tariff collection scenarios

The trend of household groups is consistent across all four scenarios. User groupings primarily fall within the design limit, with the largest distribution in group 4 (approximately 60 households). The distribution sharply declines following this group with a notable increase in the final group in all

scenarios (above 120 households). As households commonly obtain water from multiple sources, it is possible that these water points are considered secondary sources. Hence the large proportion of cases in the final grouping (greater than double the Afridev design limit of 120 households). Households utilising multiple water points may not financially contribute to all water points. Therefore, usage above the design limit of the Afridev may not receive tariffs from all recorded households, impacting the potential financial resources available for O&M.

When concerning the tariff amount the distribution of the scenarios is more pronounced, primarily falling in groups 1-5 and 10-12. Firstly, scenario A primarily falls within the first two tariff groups with significantly low occurrences above group 5 (approximately 500 MWK). This is to be expected due to the frequent collection of tariffs, thus important for the tariff to be an affordable amount when collected per month. Scenario B similarly falls within 500 MWK. The larger distribution of tariffs compared to Scenario A could be attributed to the variations of costs associated with each repair, and therefore higher tariffs may be considered for more costly repairs as the Afridev ages. Scenario C expresses primarily falls within group 5 (approximately 500MWK) due to the infrequency of the collection period when compared to scenario A. However, financial resources per annum would significantly differ between the scenarios to meet the required O&M costs during the life-cycle of the Afridev handpump. Finally, scenario D presents cases where no tariff has set by the service provider. Table S4 presents the reported explanations why no tariff has been set.

**Table S4.** Reasons why no tariff is set (Scenario D)

| Variable                                             | n    | %     |
|------------------------------------------------------|------|-------|
| External Support                                     | 642  | 18.09 |
| Lack of training                                     | 1313 | 37.00 |
| Lack of understanding                                | 20   | 0.56  |
| Enough money or other forms of community fundraising | 313  | 8.82  |
| Reluctance to pay                                    | 299  | 8.42  |
| Non-functional/Unreliable water point                | 128  | 3.61  |
| Lack of coordination/Negligence                      | 172  | 4.85  |
| Perception water is free                             | 67   | 1.89  |
| Poor water quality                                   | 26   | 0.73  |
| New water point or have yet to experience breakdown  | 167  | 4.71  |
| Ask community for contributions when needs arises    | 376  | 10.59 |
| Other                                                | 26   | 0.73  |

Lack of training for the service provider is the most common reported reason why no tariff is set in the rural areas (37%). Other variables in Table 2 can also be associated with lack of training such as lack of understanding (0.56%), lack of coordination/negligence (4.85%), new water point or have yet to experience breakdown (4.71%) and ask community for contributions when needs arise (10.59%). Other forms of financing have also been reported. External support from institutions, local government or NGOs attributes to 18.09% of cases, however there may be a perception that the responsibility falls with someone else (RWSN Executive Steering Committee, 2010; Koehler *et al.*, 2018) resulting in a lack of financing and O&M. Enough money or other forms of community fundraising attributes to 8.82% of cases which raises the question if this is sufficient for O&M across the life-cycle of infrastructure. It is well recognised throughout studies that external support and continued training of service provision is essential to the continued service delivery of the water supply at the community level (Harvey and Reed, 2006; Whittington *et al.*, 2009; RWSN Executive Steering Committee, 2010; Foster, 2013). These variables of poor capacity building at the local level further highlight the inappropriateness of the standardised CBM model for rural water supply.

The willingness to pay by community members is well-recognised factor in rural water supply. While this can affect scenarios with an established tariff, in the case of Scenario D the willingness to pay can potentially be attributed to the collapse of a financial mechanism. In Table S2 this can be attributed to two areas: the condition of the water point (Non-functional/Unreliable (3.61%) and poor water quality (0.73%)) and socio-cultural characteristics (perception water is free (1.89%) and Reluctance to pay (8.42%)).

Firstly, the non-functional/unreliable indicates the water point is not producing water as is intended. While it is possible that the lack of understanding financial mechanism have for the continued service delivery of assets may be a contributing factor, poor construction or improper siting of water points contribute to premature failure. The poor water quality variable highlights this as saline water was the most common of the cases.

Secondly, the perception of water and the quality of service provision contributes to the premature failure of water points and management. The cases of reluctance to pay are attributed to poverty and inability to pay in the communities. It is also attributed to a mistrust in the service provider or from previous interference with the collected financial resources. Previous studies have also supported these findings in willingness to pay (van den Broek and Brown, 2015), reinforcing the understanding that CBM is has reached its limit as an appropriate method for service delivery.

It is clear infrastructure and management requires continued support and monitoring to ensure sustainable services at the local level (RWSN Executive Steering Committee, 2010; Carter and Ross, 2016). The reasons behind why no tariffs are in place are useful narratives when understanding and supporting the wider local contexts, which has been absent from traditional CBM approaches.



### 3. Shortfall in potential financial resources

The potential annual financial resources under each scenario for O&M was calculated using the following matrix:

$$\begin{bmatrix} a_{11} & a_{12} & \cdots & a_{1n} \\ a_{21} & a_{22} & \cdots & a_{2n} \\ \vdots & \vdots & \ddots & \vdots \\ a_{m1} & a_{m2} & \cdots & a_{mn} \end{bmatrix} = A_{ij}$$

Where, a = Potential financial resources (MWK), m = Set tariff group (MWK), n = No. of potentially contributing households' group. The household and tariff amounts are presented in Table S3.

**Table S5.** Household and tariff amount grouping

| Value | m (MWK)        | n (households) |
|-------|----------------|----------------|
| 1     | <=100          | 15             |
| 2     | >100 & <=200   | 30             |
| 3     | >200 & <=300   | 45             |
| 4     | >300 & <=400   | 60             |
| 5     | >400 & <=500   | 75             |
| 6     | >500 & <=600   | 90             |
| 7     | >600 & <=700   | 105            |
| 8     | >700 & <=800   | 120            |
| 9     | >800 & <=900   | -              |
| 10    | >900 & <=1000  | -              |
| 11    | >1000 & <=2000 | -              |

The model was run for a low, medium and high value in each of the tariff groups (i.e. for group >100 and <=200 MWK, the values 101MWK (low), 150MWK (medium) and 200MWK (high) were applied). The potential financial resources across the 15 year period were determined using the following steps:

$$\begin{aligned} \text{Step 1} &= y_1 = (cA)_{ij} \\ \text{Step 2} &= y_2 = y_1 + (cA)_{ij} \\ &\vdots \\ \text{Step } n &= y_{n+1} = y_n + (cA)_{ij} \end{aligned}$$

Where,  $y_n$  = Year n of the life-cycle, A = Potential Financial Resources Matrix, i = Set tariff (MWK), j = No. of potentially contributing households and c =Frequency of Tariff based on the designated scenario (scalar) specified as: Scenario A multiplying the matrix by 12; Scenario B was determined based on the results of the life-cycle model. If a component was replaced in a given year in the Afridev life-cycle then the matrix is applied; Scenario C required no scalar; Scenario D was omitted as no other financial information was available.

The annualised potential financial resources for each scenario were weighed against the cumulative costs of the Afridev across the 15 year design life for best and worst case R.R. and T.OpEx models, outlined in section 1. The minimum, average and maximum year of potential shortfall was determined for each scenario. This is presented in the following tables and figures.

**Table S6.** Scenario A – Recommended Repairs (R.R) projected year of shortfall

| Household Group | Year of Shortfall | Tariff Group |      |      |      |      |      |      |      |      |      |      |      |
|-----------------|-------------------|--------------|------|------|------|------|------|------|------|------|------|------|------|
|                 |                   | 1            | 2    | 3    | 4    | 5    | 6    | 7    | 8    | 9    | 10   | 11   |      |
| 1               | Min               | 1            | 3    | #N/A |
|                 | Avg               | 3            | 5    | #N/A |
|                 | Max               | 5            | 10   | #N/A |
| 2               | Min               | 1            | #N/A |
|                 | Avg               | 4            | #N/A |
|                 | Max               | 10           | #N/A |
| 3               | Min               | #N/A         | #N/A | #N/A | #N/A | #N/A | #N/A | #N/A | #N/A | #N/A | #N/A | #N/A | #N/A |
|                 | Avg               | #N/A         | #N/A | #N/A | #N/A | #N/A | #N/A | #N/A | #N/A | #N/A | #N/A | #N/A | #N/A |
|                 | Max               | #N/A         | #N/A | #N/A | #N/A | #N/A | #N/A | #N/A | #N/A | #N/A | #N/A | #N/A | #N/A |
| 4               | Min               | #N/A         | #N/A | #N/A | #N/A | #N/A | #N/A | #N/A | #N/A | #N/A | #N/A | #N/A | #N/A |
|                 | Avg               | #N/A         | #N/A | #N/A | #N/A | #N/A | #N/A | #N/A | #N/A | #N/A | #N/A | #N/A | #N/A |
|                 | Max               | #N/A         | #N/A | #N/A | #N/A | #N/A | #N/A | #N/A | #N/A | #N/A | #N/A | #N/A | #N/A |
| 5               | Min               | #N/A         | #N/A | #N/A | #N/A | #N/A | #N/A | #N/A | #N/A | #N/A | #N/A | #N/A | #N/A |
|                 | Avg               | #N/A         | #N/A | #N/A | #N/A | #N/A | #N/A | #N/A | #N/A | #N/A | #N/A | #N/A | #N/A |
|                 | Max               | #N/A         | #N/A | #N/A | #N/A | #N/A | #N/A | #N/A | #N/A | #N/A | #N/A | #N/A | #N/A |
| 6               | Min               | #N/A         | #N/A | #N/A | #N/A | #N/A | #N/A | #N/A | #N/A | #N/A | #N/A | #N/A | #N/A |
|                 | Avg               | #N/A         | #N/A | #N/A | #N/A | #N/A | #N/A | #N/A | #N/A | #N/A | #N/A | #N/A | #N/A |
|                 | Max               | #N/A         | #N/A | #N/A | #N/A | #N/A | #N/A | #N/A | #N/A | #N/A | #N/A | #N/A | #N/A |
| 7               | Min               | #N/A         | #N/A | #N/A | #N/A | #N/A | #N/A | #N/A | #N/A | #N/A | #N/A | #N/A | #N/A |
|                 | Avg               | #N/A         | #N/A | #N/A | #N/A | #N/A | #N/A | #N/A | #N/A | #N/A | #N/A | #N/A | #N/A |
|                 | Max               | #N/A         | #N/A | #N/A | #N/A | #N/A | #N/A | #N/A | #N/A | #N/A | #N/A | #N/A | #N/A |
| 8               | Min               | #N/A         | #N/A | #N/A | #N/A | #N/A | #N/A | #N/A | #N/A | #N/A | #N/A | #N/A | #N/A |
|                 | Avg               | #N/A         | #N/A | #N/A | #N/A | #N/A | #N/A | #N/A | #N/A | #N/A | #N/A | #N/A | #N/A |
|                 | Max               | #N/A         | #N/A | #N/A | #N/A | #N/A | #N/A | #N/A | #N/A | #N/A | #N/A | #N/A | #N/A |

\* Where #N/A represents no shortfall within the 15 year design life of the Afridev

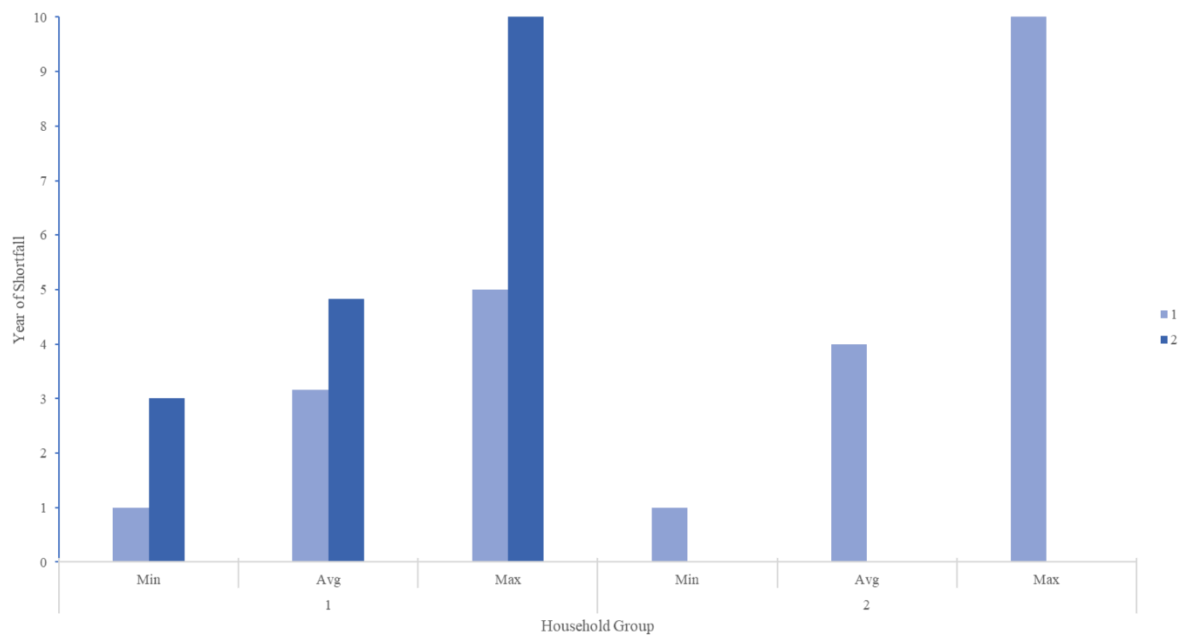

**Figure S4.** Scenario A – R.R forecasted year of shortfall

**Table S7.** Scenario A – Total Operations Expenditure (T.OpEx) projected shortfall

| Household Group | Year of Shortfall | Tariff Group |    |      |      |      |      |      |      |      |      |      |
|-----------------|-------------------|--------------|----|------|------|------|------|------|------|------|------|------|
|                 |                   | 1            | 2  | 3    | 4    | 5    | 6    | 7    | 8    | 9    | 10   | 11   |
| 1               | Min               | 1            | 3  | 3    | 3    | 3    | 4    | 5    | 5    | 6    | 6    | #N/A |
|                 | Avg               | 3            | 4  | 4    | 5    | 5    | 6    | 7    | 7    | 8    | 8    | #N/A |
|                 | Max               | 5            | 5  | 6    | 6    | 7    | 8    | 9    | 10   | 10   | 11   | #N/A |
| 2               | Min               | 1            | 3  | 3    | 5    | 6    | 6    | 7    | 8    | #N/A | #N/A | #N/A |
|                 | Avg               | 3            | 4  | 6    | 7    | 8    | 9    | 10   | 12   | #N/A | #N/A | #N/A |
|                 | Max               | 5            | 6  | 8    | 10   | 11   | 12   | 14   | 15   | #N/A | #N/A | #N/A |
| 3               | Min               | 1            | 3  | 5    | 6    | 7    | #N/A | #N/A | #N/A | #N/A | #N/A | #N/A |
|                 | Avg               | 3            | 6  | 7    | 9    | 11   | #N/A | #N/A | #N/A | #N/A | #N/A | #N/A |
|                 | Max               | 6            | 8  | 10   | 12   | 15   | #N/A | #N/A | #N/A | #N/A | #N/A | #N/A |
| 4               | Min               | 1            | 3  | 6    | 7    | #N/A |
|                 | Avg               | 3            | 6  | 9    | 11   | #N/A |
|                 | Max               | 6            | 10 | 12   | 15   | #N/A |
| 5               | Min               | 1            | 4  | 6    | #N/A |
|                 | Avg               | 4            | 7  | 10   | #N/A |
|                 | Max               | 7            | 11 | 15   | #N/A |
| 6               | Min               | 1            | 5  | #N/A |
|                 | Avg               | 4            | 8  | #N/A |
|                 | Max               | 8            | 12 | #N/A |
| 7               | Min               | 1            | 5  | #N/A |
|                 | Avg               | 4            | 9  | #N/A |
|                 | Max               | 9            | 14 | #N/A |
| 8               | Min               | 1            | 6  | #N/A |
|                 | Avg               | 5            | 10 | #N/A |
|                 | Max               | 10           | 15 | #N/A |

\* Where #N/A represents no shortfall within the 15 year design life of the Afridev

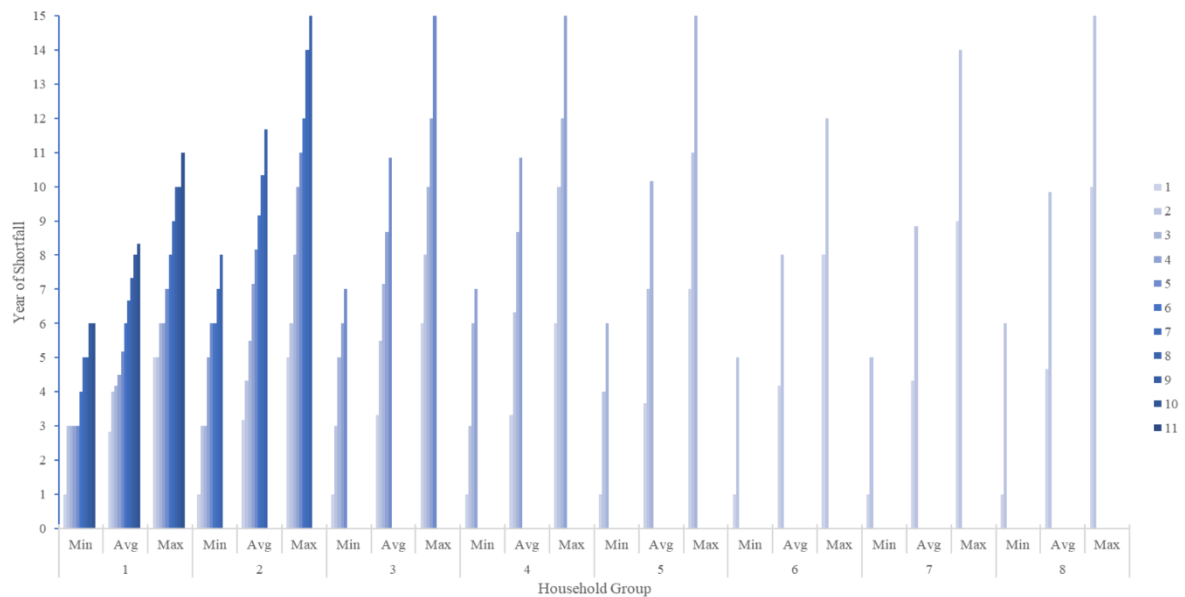

**Figure S5.** Scenario A – T.OpEx forecasted year of shortfall

**Table S8.** Scenario B – Recommended Repairs (R.R) projected shortfall

| Household Group | Year of Shortfall | Tariff Group |   |   |   |   |   |   |   |   |    |    |
|-----------------|-------------------|--------------|---|---|---|---|---|---|---|---|----|----|
|                 |                   | 1            | 2 | 3 | 4 | 5 | 6 | 7 | 8 | 9 | 10 | 11 |
| 1               | Min               | 1            | 1 | 2 | 2 | 2 | 2 | 2 | 3 | 3 | 3  | 3  |
|                 | Avg               | 2            | 2 | 3 | 3 | 3 | 3 | 4 | 4 | 4 | 4  | 4  |
|                 | Max               | 2            | 3 | 3 | 3 | 3 | 4 | 5 | 5 | 5 | 5  | 5  |
| 2               | Min               | 1            | 2 | 2 | 2 | 3 | 3 | 3 | 3 | 3 | 3  | 3  |
|                 | Avg               | 2            | 3 | 3 | 4 | 4 | 4 | 4 | 4 | 4 | 4  | 4  |
|                 | Max               | 3            | 3 | 4 | 5 | 5 | 5 | 5 | 5 | 5 | 5  | 5  |
| 3               | Min               | 1            | 2 | 2 | 3 | 3 | 3 | 3 | 3 | 3 | 3  | 3  |
|                 | Avg               | 2            | 3 | 4 | 4 | 4 | 4 | 4 | 4 | 4 | 4  | 4  |
|                 | Max               | 3            | 4 | 5 | 5 | 5 | 5 | 5 | 5 | 5 | 5  | 5  |
| 4               | Min               | 1            | 2 | 3 | 3 | 3 | 3 | 3 | 3 | 3 | 3  | 3  |
|                 | Avg               | 2            | 3 | 4 | 4 | 4 | 4 | 4 | 4 | 4 | 4  | 4  |
|                 | Max               | 3            | 5 | 5 | 5 | 5 | 5 | 5 | 5 | 5 | 5  | 5  |
| 5               | Min               | 1            | 2 | 3 | 3 | 3 | 3 | 3 | 3 | 3 | 3  | 3  |
|                 | Avg               | 2            | 4 | 4 | 4 | 4 | 4 | 4 | 4 | 4 | 4  | 4  |
|                 | Max               | 3            | 5 | 5 | 5 | 5 | 5 | 5 | 5 | 5 | 5  | 5  |
| 6               | Min               | 1            | 2 | 3 | 3 | 3 | 3 | 3 | 3 | 3 | 3  | 3  |
|                 | Avg               | 2            | 4 | 4 | 4 | 4 | 4 | 4 | 4 | 4 | 4  | 4  |
|                 | Max               | 4            | 5 | 5 | 5 | 5 | 5 | 5 | 5 | 5 | 5  | 6  |
| 7               | Min               | 1            | 3 | 3 | 3 | 3 | 3 | 3 | 3 | 3 | 3  | 3  |
|                 | Avg               | 3            | 4 | 4 | 4 | 4 | 4 | 4 | 4 | 4 | 4  | 5  |
|                 | Max               | 5            | 5 | 5 | 5 | 5 | 5 | 5 | 5 | 5 | 5  | 7  |
| 8               | Min               | 1            | 3 | 3 | 3 | 3 | 3 | 3 | 3 | 3 | 3  | 3  |
|                 | Avg               | 3            | 4 | 4 | 4 | 4 | 4 | 4 | 4 | 4 | 4  | 5  |
|                 | Max               | 5            | 5 | 5 | 5 | 5 | 5 | 5 | 5 | 5 | 5  | 7  |

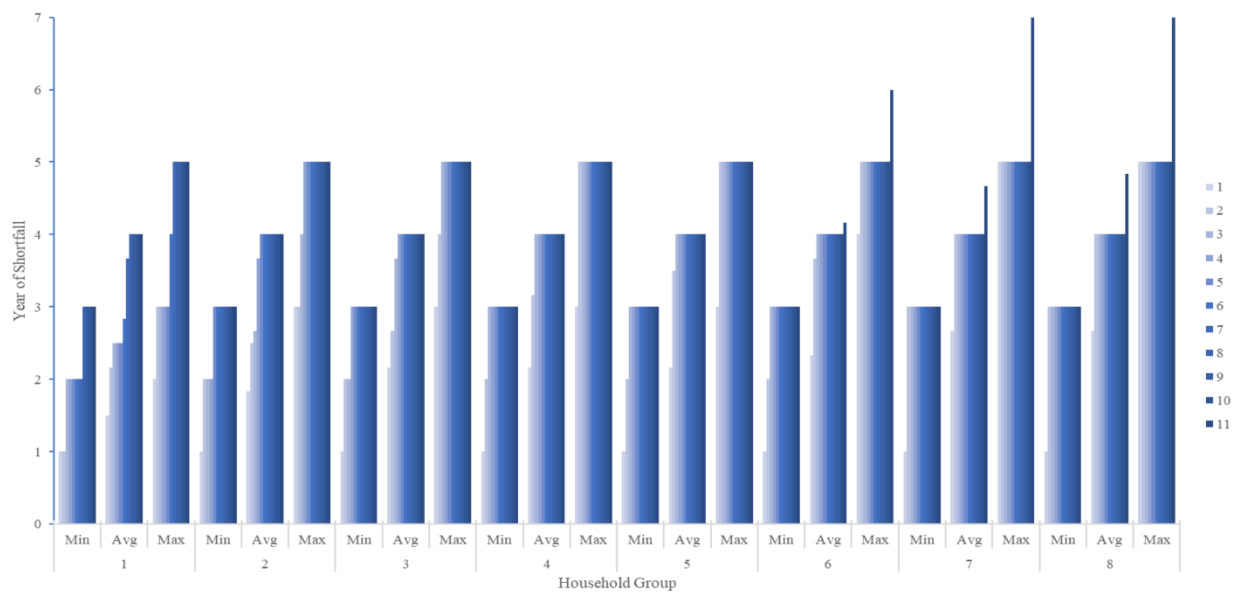

**Figure S6.** Scenario B – R.R forecasted year of shortfall

**Table S9.** Scenario B – Total Operations Expenditure (T.OpEx) projected shortfall

| Household Group | Year of Shortfall | Tariff Group |   |   |   |   |   |   |   |   |    |    |
|-----------------|-------------------|--------------|---|---|---|---|---|---|---|---|----|----|
|                 |                   | 1            | 2 | 3 | 4 | 5 | 6 | 7 | 8 | 9 | 10 | 11 |
| 1               | Min               | 1            | 1 | 1 | 1 | 1 | 2 | 2 | 2 | 2 | 2  | 2  |
|                 | Avg               | 2            | 2 | 2 | 2 | 2 | 3 | 3 | 3 | 3 | 3  | 3  |
|                 | Max               | 2            | 2 | 2 | 2 | 3 | 3 | 3 | 3 | 3 | 3  | 4  |
| 2               | Min               | 1            | 1 | 1 | 2 | 2 | 2 | 2 | 2 | 2 | 3  | 3  |
|                 | Avg               | 2            | 2 | 2 | 3 | 3 | 3 | 3 | 3 | 3 | 4  | 4  |
|                 | Max               | 2            | 2 | 3 | 3 | 3 | 3 | 3 | 4 | 4 | 4  | 5  |
| 3               | Min               | 1            | 1 | 2 | 2 | 2 | 2 | 3 | 3 | 3 | 3  | 3  |
|                 | Avg               | 2            | 2 | 3 | 3 | 3 | 3 | 4 | 4 | 4 | 4  | 4  |
|                 | Max               | 2            | 3 | 3 | 3 | 3 | 4 | 4 | 4 | 4 | 4  | 5  |
| 4               | Min               | 1            | 1 | 2 | 2 | 2 | 3 | 3 | 3 | 3 | 3  | 3  |
|                 | Avg               | 2            | 2 | 3 | 3 | 3 | 4 | 4 | 4 | 4 | 4  | 4  |
|                 | Max               | 2            | 3 | 3 | 4 | 4 | 4 | 4 | 5 | 5 | 5  | 5  |
| 5               | Min               | 1            | 2 | 2 | 2 | 3 | 3 | 3 | 3 | 3 | 3  | 3  |
|                 | Avg               | 2            | 3 | 3 | 3 | 4 | 4 | 4 | 4 | 4 | 4  | 4  |
|                 | Max               | 3            | 3 | 3 | 4 | 4 | 4 | 5 | 5 | 5 | 5  | 5  |
| 6               | Min               | 1            | 2 | 2 | 3 | 3 | 3 | 3 | 3 | 3 | 3  | 3  |
|                 | Avg               | 2            | 3 | 3 | 4 | 4 | 4 | 4 | 4 | 4 | 4  | 4  |
|                 | Max               | 3            | 3 | 4 | 4 | 4 | 5 | 5 | 5 | 5 | 5  | 5  |
| 7               | Min               | 1            | 2 | 2 | 3 | 3 | 3 | 3 | 3 | 3 | 3  | 3  |
|                 | Avg               | 2            | 3 | 3 | 4 | 4 | 4 | 4 | 4 | 4 | 4  | 4  |
|                 | Max               | 3            | 3 | 4 | 4 | 5 | 5 | 5 | 5 | 5 | 5  | 5  |
| 8               | Min               | 1            | 2 | 2 | 3 | 3 | 3 | 3 | 3 | 3 | 3  | 3  |
|                 | Avg               | 2            | 3 | 3 | 4 | 4 | 4 | 4 | 4 | 4 | 4  | 4  |
|                 | Max               | 3            | 4 | 4 | 5 | 5 | 5 | 5 | 5 | 5 | 5  | 5  |

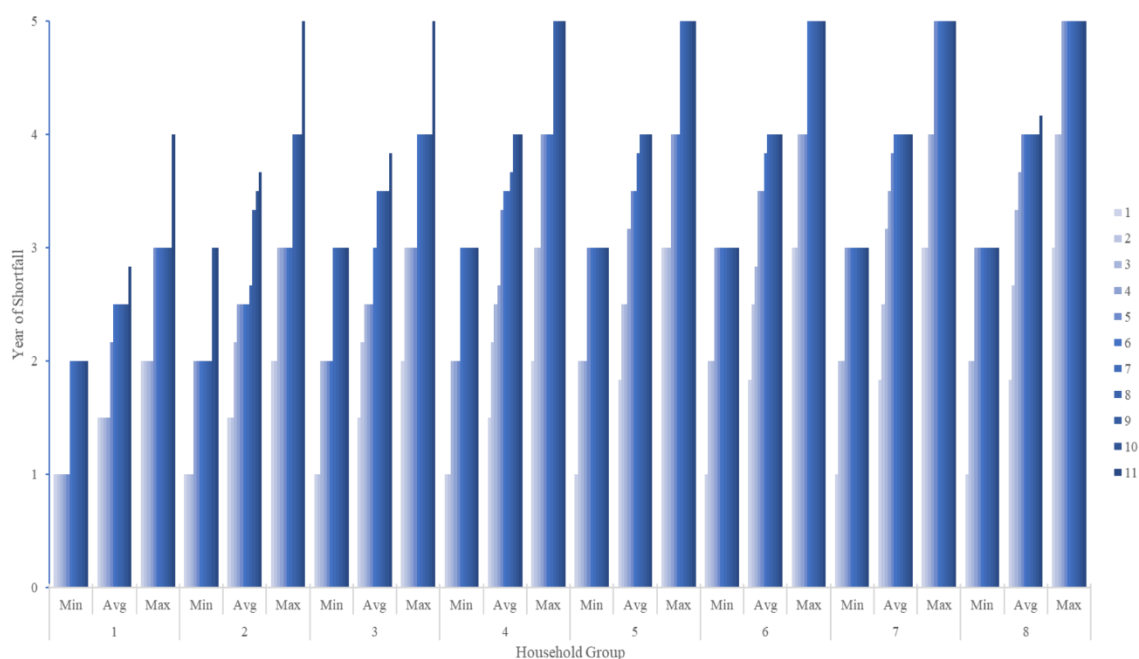

**Figure S7.** Scenario B – T.OpEx forecasted year of shortfall

**Table S10.** Scenario C – Recommended Repairs (R.R) projected shortfall

| Household Group | Year of Shortfall | Tariff Group |   |    |    |      |      |      |      |      |      |      |
|-----------------|-------------------|--------------|---|----|----|------|------|------|------|------|------|------|
|                 |                   | 1            | 2 | 3  | 4  | 5    | 6    | 7    | 8    | 9    | 10   | 11   |
| 1               | Min               | 1            | 1 | 2  | 2  | 3    | 3    | 3    | 3    | 3    | 3    | 3    |
|                 | Avg               | 2            | 3 | 4  | 4  | 4    | 4    | 4    | 4    | 4    | 4    | 4    |
|                 | Max               | 3            | 5 | 5  | 5  | 5    | 5    | 5    | 5    | 5    | 5    | 5    |
| 2               | Min               | 1            | 2 | 3  | 3  | 3    | 3    | 3    | 3    | 3    | 3    | #N/A |
|                 | Avg               | 2            | 4 | 4  | 4  | 4    | 4    | 4    | 4    | 4    | 4    | #N/A |
|                 | Max               | 5            | 5 | 5  | 5  | 5    | 5    | 5    | 5    | 5    | 5    | #N/A |
| 3               | Min               | 1            | 2 | 3  | 3  | 3    | 3    | 3    | 3    | 3    | 3    | #N/A |
|                 | Avg               | 3            | 4 | 4  | 4  | 4    | 4    | 4    | 5    | 7    | 7    | #N/A |
|                 | Max               | 5            | 5 | 5  | 5  | 5    | 5    | 5    | 10   | 10   | 15   | #N/A |
| 4               | Min               | 1            | 3 | 3  | 3  | 3    | 3    | 3    | 3    | #N/A | #N/A | #N/A |
|                 | Avg               | 3            | 4 | 4  | 4  | 4    | 5    | 7    | 8    | #N/A | #N/A | #N/A |
|                 | Max               | 5            | 5 | 5  | 5  | 5    | 10   | 10   | 15   | #N/A | #N/A | #N/A |
| 5               | Min               | 1            | 3 | 3  | 3  | 3    | 3    | #N/A | #N/A | #N/A | #N/A | #N/A |
|                 | Avg               | 3            | 4 | 4  | 4  | 5    | 7    | #N/A | #N/A | #N/A | #N/A | #N/A |
|                 | Max               | 5            | 5 | 5  | 5  | 10   | 15   | #N/A | #N/A | #N/A | #N/A | #N/A |
| 6               | Min               | 1            | 3 | 3  | 3  | 3    | #N/A | #N/A | #N/A | #N/A | #N/A | #N/A |
|                 | Avg               | 3            | 4 | 4  | 5  | 7    | #N/A | #N/A | #N/A | #N/A | #N/A | #N/A |
|                 | Max               | 5            | 5 | 5  | 10 | 15   | #N/A | #N/A | #N/A | #N/A | #N/A | #N/A |
| 7               | Min               | 1            | 3 | 3  | 3  | #N/A |
|                 | Avg               | 3            | 4 | 4  | 6  | #N/A |
|                 | Max               | 5            | 5 | 5  | 10 | #N/A |
| 8               | Min               | 1            | 3 | 3  | 3  | #N/A |
|                 | Avg               | 3            | 4 | 5  | 7  | #N/A |
|                 | Max               | 5            | 5 | 10 | 15 | #N/A |

\* Where #N/A represents no shortfall within the 15 year design life of the Afridev

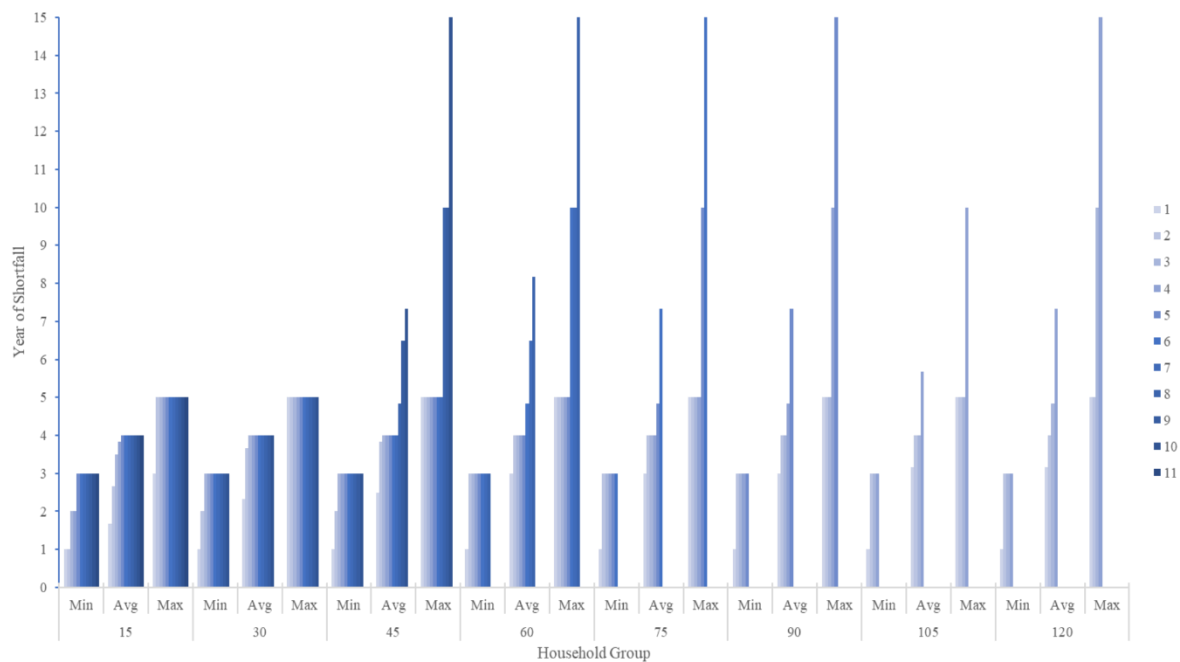

**Figure S8.** Scenario C – R.R forecasted year of shortfall

**Table S11.** Scenario C – Total Operations Expenditure (T.OpEx) projected shortfall

| Household Group | Year of Shortfall | Tariff Group |   |   |   |   |   |   |   |   |    |    |
|-----------------|-------------------|--------------|---|---|---|---|---|---|---|---|----|----|
|                 |                   | 1            | 2 | 3 | 4 | 5 | 6 | 7 | 8 | 9 | 10 | 11 |
| 1               | Min               | 1            | 1 | 1 | 1 | 1 | 2 | 2 | 2 | 2 | 3  | 3  |
|                 | Avg               | 2            | 2 | 2 | 2 | 2 | 3 | 3 | 3 | 4 | 4  | 4  |
|                 | Max               | 2            | 2 | 3 | 3 | 3 | 4 | 4 | 5 | 5 | 5  | 5  |
| 2               | Min               | 1            | 1 | 1 | 2 | 2 | 3 | 3 | 3 | 3 | 3  | 3  |
|                 | Avg               | 2            | 2 | 3 | 3 | 4 | 4 | 4 | 4 | 4 | 4  | 4  |
|                 | Max               | 2            | 3 | 4 | 5 | 5 | 5 | 5 | 5 | 5 | 5  | 6  |
| 3               | Min               | 1            | 1 | 2 | 3 | 3 | 3 | 3 | 3 | 3 | 3  | 3  |
|                 | Avg               | 2            | 3 | 3 | 4 | 4 | 4 | 4 | 4 | 4 | 4  | 5  |
|                 | Max               | 3            | 4 | 5 | 5 | 5 | 5 | 5 | 5 | 5 | 5  | 7  |
| 4               | Min               | 1            | 1 | 2 | 3 | 3 | 3 | 3 | 3 | 3 | 3  | 3  |
|                 | Avg               | 2            | 3 | 4 | 4 | 4 | 4 | 4 | 4 | 4 | 5  | 6  |
|                 | Max               | 3            | 5 | 5 | 5 | 5 | 5 | 5 | 5 | 6 | 6  | 9  |
| 5               | Min               | 1            | 2 | 3 | 3 | 3 | 3 | 3 | 3 | 3 | 3  | 4  |
|                 | Avg               | 2            | 3 | 4 | 4 | 4 | 4 | 4 | 5 | 5 | 5  | 7  |
|                 | Max               | 3            | 5 | 5 | 5 | 5 | 5 | 6 | 6 | 6 | 6  | 10 |
| 6               | Min               | 1            | 2 | 3 | 3 | 3 | 3 | 3 | 3 | 3 | 4  | 4  |
|                 | Avg               | 2            | 4 | 4 | 4 | 4 | 4 | 5 | 5 | 5 | 6  | 7  |
|                 | Max               | 4            | 5 | 5 | 5 | 5 | 6 | 6 | 6 | 7 | 7  | 11 |
| 7               | Min               | 1            | 2 | 3 | 3 | 3 | 3 | 3 | 4 | 4 | 4  | 4  |
|                 | Avg               | 2            | 4 | 4 | 4 | 4 | 5 | 5 | 5 | 6 | 6  | 8  |
|                 | Max               | 4            | 5 | 5 | 5 | 6 | 6 | 6 | 7 | 7 | 8  | 12 |
| 8               | Min               | 1            | 2 | 3 | 3 | 3 | 3 | 3 | 4 | 4 | 5  | 5  |
|                 | Avg               | 2            | 4 | 4 | 4 | 4 | 5 | 5 | 6 | 6 | 7  | 9  |
|                 | Max               | 5            | 5 | 5 | 5 | 6 | 6 | 7 | 8 | 8 | 9  | 13 |

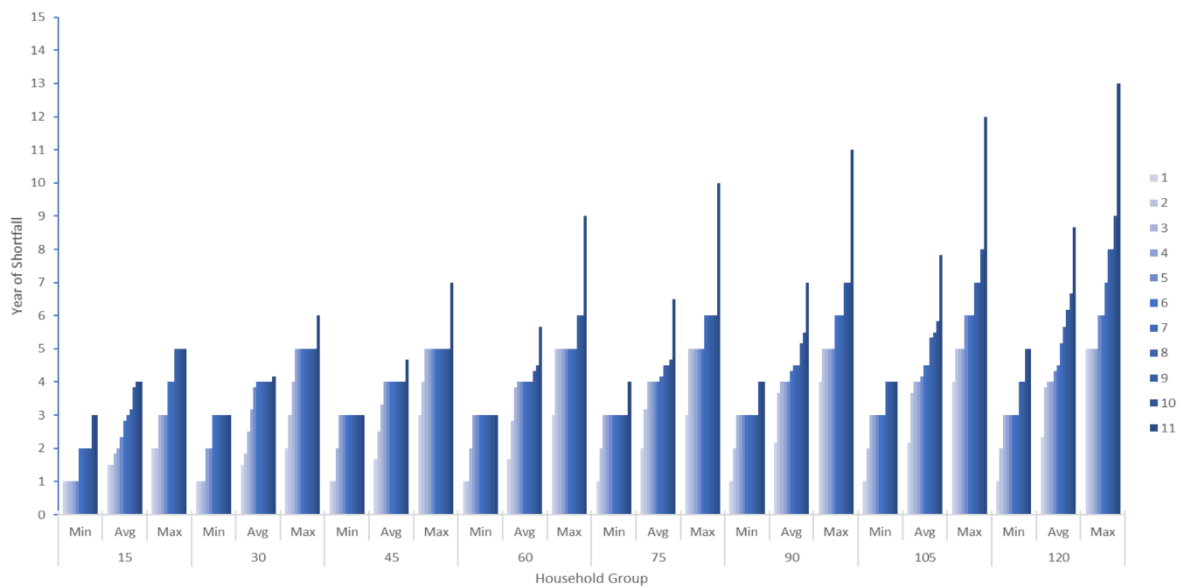

**Figure S9.** Scenario C – T.OpEx forecasted year of shortfall

## References

- van den Broek, M. and Brown, J. (2015) 'Blueprint for breakdown? Community Based Management of rural groundwater in Uganda', *Geoforum*. Pergamon, 67, pp. 51–63. doi: 10.1016/J.GEOFORUM.2015.10.009.
- Carter, R. C. and Ross, I. (2016) 'Beyond "functionality" of handpump-supplied rural water services in developing countries', *Waterlines*. Practical Action Publishing , 35(1), pp. 94–110. doi: 10.3362/1756-3488.2016.008.
- Foster, T. (2013) 'Predictors of Sustainability for Community-Managed Handpumps in Sub-Saharan Africa: Evidence from Liberia, Sierra Leone, and Uganda', *Environmental Science & Technology*, 47(21), pp. 12037–12046. doi: 10.1021/es402086n.
- Harvey, P. A. and Reed, R. A. (2006) 'Community-managed water supplies in Africa: sustainable or dispensable?', *Community Development Journal*. Oxford University Press, 42(3), pp. 365–378. doi: 10.1093/cdj/bsl001.
- Koehler, J. *et al.* (2018) 'A cultural theory of drinking water risks, values and institutional change', *Global Environmental Change*. Pergamon, 50, pp. 268–277. doi: 10.1016/J.GLOENVCHA.2018.03.006.
- RWSN Executive Steering Committee (2010) *Myths of the Rural Water Supply Sector, RWSN Perspective No 4*. St Gallen, Switzerland. Available at: <https://www.ircwash.org/sites/default/files/RWSN-2010-Myths.pdf> (Accessed: 13 December 2017).
- United Nations (2018) *Sustainable Development Goal 6 Synthesis Report on Water and Sanitation*. New York: United Nations.
- Whittington, D. *et al.* (2009) 'How well is the demand-driven, community management model for rural water supply systems doing? Evidence from Bolivia, Peru and Ghana', *Water Policy*. IWA Publishing, 11(6), p. 696. doi: 10.2166/wp.2009.310.
